# Supplementary material
Source: PubMed Central journal article supplement (PMC8576825)
Supplement: NIHMS1740971-supplement-Supplementary_material.pdf [file NIHMS1740971-supplement-Supplementary_material.pdf]

Meeting Attendees for the ACSM International Multidisciplinary Roundtable on Exercise and  
Cancer Prevention and Control

| <b>Name</b> |              | <b>Organizational<br/>affiliation</b> | <b>Role</b>             |
|-------------|--------------|---------------------------------------|-------------------------|
| Kathryn     | Schmitz      | ACSM                                  | Meeting Co-Chair        |
| Chuck       | Matthews     | NIH                                   | Meeting Co-Chair        |
| Lynn        | Gerber       | AAPMR, FPMR                           | Organizing<br>Committee |
| Trisha      | Hue          | Sunflower<br>Wellness                 | Organizing<br>Committee |
| Steve       | Morris       | APTA                                  | Organizing<br>Committee |
| Alpa        | Patel        | ACS                                   | Organizing<br>Committee |
| Susan       | Helmrich     | Self                                  | patient advocate        |
| Catherine   | Alfano       | ACS                                   | Presenter               |
| Kristin     | Campbell     | CSEP                                  | Presenter               |
| Anna        | Campbell     | MacMillan                             | Presenter               |
| Andrea      | Cheville     | AAPMR                                 | Presenter               |
| Kerry       | Courneya     | U Alberta                             | Presenter               |
| Christine   | Friedenreich | Alberta Health<br>Services            | Presenter               |
| Sandi       | Hayes        | ESSA                                  | Presenter               |
| Lee         | Jones        | ASCO                                  | Presenter               |

|                |                   |                               |           |
|----------------|-------------------|-------------------------------|-----------|
| Jennifer       | Ligibel           | ASCO                          | Presenter |
| Steve          | Moore             | NIH                           | Presenter |
| Bernadine      | Pinto             | SBM                           | Presenter |
| Martijn        | Stuiver           | Royal Dutch PT<br>Association | Presenter |
| Kerri          | Winters-<br>Stone | ACSM                          | Presenter |
| Joachim        | Wiskemann         | DGVS                          | Presenter |
| Bill           | Bain              | Sunflower                     | attendee  |
| Leighton       | Chan              | NIH Clinical<br>Center        | attendee  |
| Crystal        | Denlinger         | NCCN                          | attendee  |
| Colleen        | Doyle             | ACS                           | attendee  |
| Janet          | Fulton            | CDC                           | attendee  |
| Daniel         | Galvao            | ESSA                          | attendee  |
| Stephanie      | George            | NIH                           | attendee  |
| Niraj          | Gusani            | SSO                           | attendee  |
| Ana<br>Valeria | Martin            | University of<br>Washington   | attendee  |
| Anne           | May               | Royal Dutch PT<br>Association | attendee  |
| Frank          | Perna             | NIH                           | attendee  |
| Robert         | Sallis            | ACSM                          | attendee  |

|        |                  |                                   |          |
|--------|------------------|-----------------------------------|----------|
| Anna   | Schwartz         | Northern<br>Arizona<br>University | attendee |
| Julie  | Silver           | CARF                              | attendee |
| Fiona  | Smith<br>Flowers | MacMillan                         | attendee |
| Jonas  | Sokolof          | ACLM                              | attendee |
| Nicole | Stout            | CARF                              | attendee |
| David  | Zucker           | AAPMR                             | attendee |
